# Supplementary material
Source: PubMed Central journal article supplement (PMC9883241)
Supplement: 43856_2023_244_MOESM3_ESM.pdf [file 43856_2023_244_MOESM3_ESM.pdf]

## **Description of Additional Supplementary Files**

**File Name:** Supplementary Data 1

**Description:** Supplementary file with source data for figures 2-4
